# Supplementary material for: Interhospital Transfer Outcomes for Critically Ill Patients With Coronavirus Disease 2019 Requiring Mechanical Ventilation
Source: PubMed Central journal article supplement — Crit Care Explor. 2021 Oct 18;3(10):e0559. doi: 10.1097/CCE.0000000000000559 (PMC8553251; doi:10.1097/cce.0000000000000559), 2021-10-18
Supplement: cc9-3-e0559-s002.pdf [file cc9-3-e0559-s002.pdf]

**e-Table 1:** Adjusted Hazard Ratio of Patient Characteristics using Weighted Multivariable Cox Regression, Censored at Discharged Alive

| Variables                       | Unweighted Adjusted Hazard Ratios <sup>+</sup> |           | Weighted Adjusted Hazard Ratios <sup>+</sup> |           |
|---------------------------------|------------------------------------------------|-----------|----------------------------------------------|-----------|
|                                 | Hazard Ratio                                   | 95% CI    | Hazard Ratio                                 | 95% CI    |
| Transferred                     | 1.14                                           | 0.78-1.66 | 1.01                                         | 0.78-1.30 |
| Age (per 10 years Older)        | 1.09                                           | 0.90-1.32 | 1.05                                         | 0.92-1.20 |
| Male Sex                        | 1.06                                           | 0.71-1.59 | 1.55*                                        | 1.15-2.08 |
| Black Race/Ethnicity            | 1.19                                           | 0.60-2.33 | 1.35                                         | 0.81-2.24 |
| Hispanic Race/Ethnicity         | 0.98                                           | 0.49-1.94 | 1.04                                         | 0.62-1.73 |
| Other Race/Ethnicity            | 1.08                                           | 0.43-2.69 | 1.12                                         | 0.58-2.15 |
| Medicaid                        | 1.06                                           | 0.63-1.80 | 0.86                                         | 0.60-1.24 |
| Medicare                        | 1.21                                           | 0.73-2.03 | 1.12                                         | 0.78-1.61 |
| Other Payor                     | 0.99                                           | 0.48-2.03 | 0.99                                         | 0.59-1.64 |
| Admission Month May – September | 1.45                                           | 0.97-2.16 | 1.34                                         | 0.99-1.78 |
| Kidney Disease                  | 0.96                                           | 0.63-1.45 | 0.74                                         | 0.55-1.01 |
| Liver Disease                   | 1.08                                           | 0.65-1.80 | 1.13                                         | 0.78-1.62 |
| Heart Disease                   | 0.79                                           | 0.31-2.03 | 0.53*                                        | 0.30-0.96 |
| Obesity                         | 0.66*                                          | 0.44-0.99 | 0.85                                         | 0.64-1.14 |
| COPD                            | 1.21                                           | 0.75-1.93 | 1.55*                                        | 1.12-2.16 |
| Diabetes                        | 1.25                                           | 0.84-1.85 | 1.48*                                        | 1.12-1.95 |

\**p*-value < 0.05; <sup>+</sup>Hazard Ratios are adjusted for all other listed variables. CI: confidence interval.

Reference categories include female sex, white race/ethnicity, commercial insurance, March – April admission month, no disease.

**e-Table 2:** Odds of Mortality vs Discharge Alive in Unweighted and Weighted Adjusted Models with Lab Values (N = 251)

| Variables                         | Unweighted Adjusted ORs <sup>+</sup> |           | Weighted Adjusted ORs <sup>+</sup> |           |
|-----------------------------------|--------------------------------------|-----------|------------------------------------|-----------|
|                                   | OR                                   | 95% CI    | OR                                 | 95% CI    |
| Transferred                       | 1.24                                 | 0.66-2.35 | 1.20                               | 0.78-1.83 |
| Age (per 10 years Older)          | 1.11                                 | 0.84-1.45 | 1.09                               | 0.90-1.32 |
| Male Sex                          | 0.96                                 | 0.53-1.74 | 1.43                               | 0.93-2.20 |
| Black Race/Ethnicity              | 1.11                                 | 0.39-3.14 | 1.37                               | 0.64-2.93 |
| Hispanic Race/Ethnicity           | 1.08                                 | 0.38-3.04 | 1.11                               | 0.52-2.36 |
| Other Race/Ethnicity              | 1.45                                 | 0.37-5.07 | 1.70                               | 0.65-4.46 |
| Medicaid                          | 1.00                                 | 0.47-2.14 | 0.78                               | 0.45-1.34 |
| Medicare                          | 1.09                                 | 0.49-2.39 | 0.94                               | 0.53-1.68 |
| Other Payor                       | 1.06                                 | 0.39-2.89 | 1.08                               | 0.52-2.22 |
| Admission Month May – September   | 2.06*                                | 1.08-3.93 | 2.16*                              | 1.36-3.45 |
| Kidney Disease (Yes) <sup>+</sup> | 1.02                                 | 0.54-1.92 | 0.87                               | 0.55-1.39 |
| Liver Disease (Yes) <sup>+</sup>  | 1.44                                 | 0.66-3.13 | 1.69                               | 0.96-2.98 |
| Heart Disease (Yes) <sup>+</sup>  | 1.02                                 | 0.25-4.12 | 0.61                               | 0.24-1.53 |
| Obesity (Yes) <sup>+</sup>        | 0.45*                                | 0.24-0.87 | 0.59*                              | 0.73-0.94 |
| COPD (Yes) <sup>+</sup>           | 1.94                                 | 0.86-4.35 | 2.53*                              | 1.40-4.56 |
| Diabetes (Yes) <sup>+</sup>       | 1.23                                 | 0.70-2.18 | 1.46                               | 0.97-2.18 |
| Troponin (Severe)                 | 0.93                                 | 0.39-2.25 | 0.74                               | 0.40-1.38 |
| C-Protein (Severe)                | 1.06                                 | 0.39-2.87 | 1.30                               | 0.64-2.62 |
| D-Dimer (Severe)                  | 1.38                                 | 0.75-2.56 | 1.27                               | 0.81-1.98 |
| P/F (Severe)                      | 1.20                                 | 0.67-2.15 | 1.26                               | 0.84-1.90 |
| AUC                               | 0.68                                 | 0.61-0.74 | 0.65                               | 0.59-0.72 |

\*p-value <0.05; <sup>+</sup>ORs are adjusted for all other listed variables. CI: confidence interval.

Reference categories include ED admit, female sex, white race/ethnicity, commercial payor, March – April admission month, no disease, non-severe lab levels.
