# Supplementary figures and images for: Interhospital Transfer Outcomes for Critically Ill Patients With Coronavirus Disease 2019 Requiring Mechanical Ventilation
Source: PubMed Central journal article supplement — Crit Care Explor. 2021 Oct 18;3(10):e0559. doi: 10.1097/CCE.0000000000000559 (PMC8553251; doi:10.1097/cce.0000000000000559), 2021-10-18

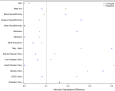

Supplement: cc9-3-e0559-s001.pdf [file cc9-3-e0559-s001.pdf]
